# Supplementary material
Source: publisher site journal article supplement (https://www.spandidos-publications.com/3901/downloadSupplementary)

Figure S1. CD248 expression in OS cell lines. Reverse transcription-quantitative PCR analysis was performed to detect CD248 expression in OS cell lines. The expression was confirmed in all cell lines. OS, osteosarcoma.

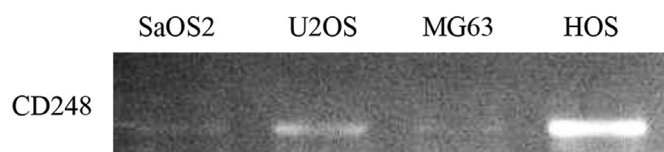

Figure S2. Apoptosis of SaOS2 and U2OS cells. Apoptosis was assessed via EtBr staining. SaOS2 and U2OS cells were treated with MORAb-004 and/or FN for 48 h and stained with ethidium bromide. Arrow depicts the apoptosis body. Scale bar, 100  $\mu$ m; magnification, x200. Data are presented as the mean  $\pm$  SD. N.S., no significance; FN, fibronectin.

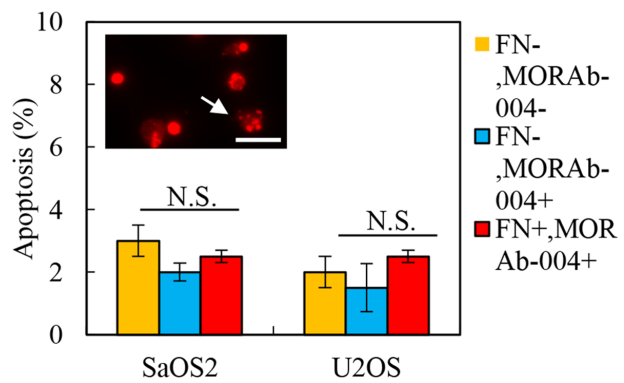

Supplement: Supplementary file 1 [file downloadSupplementary]
